# Supplementary material for: Social Contexts and Gender Disparities in Students’ Competence Beliefs: The Role of Gender-Stereotypical Beliefs and Achievement Patterns in the Classroom for Students’ Self-Concept in Gender-Stereotypical Subjects
Source: Frontiers journal article supplement (doi:10.3389/feduc.2022.840618), 2022-05-16
Supplement: Data_Sheet_1.docx [file Data_Sheet_1.docx]

**Appendix**

Table A1. Items in self-concept measure

| Item | Answer- scale |
| --- | --- |
| a) I am just not good at mathematics/ Danish* | 1 – Completely disagree  2 – Slightly disagree  3 – Neither agree or disagree  4 – Slightly agree  5 – Completely agree |
| b) I get good grades in mathematics/ Danish |
| c) I learn new things quickly in mathematics/ Danish |
|  |
| d) I have always believed that mathematics/ Danish is one of my best subjects |
| e) I understand even the most difficult topics in mathematics/ Danish |
|  |

Note: The answer scale is shown as it was presented in the survey.* Item is reverse coded for the measure.

Table A2. Items in GSB measure for students/teachers

| Item | Answer- scale |
| --- | --- |
| a) Mathematics/ Danish is easiest for... | 1 - girls  2  3  4  5  6 - both girls and boys  7  8  9  10  11 - boys |
| b) Students with the best prerequisites for mathematics/ Danish are… |
| c) The weakest students in mathematics/ Danish are... * |
| d) Interest in mathematics/ Danish is biggest among... |
| e) Students making the biggest effort in mathematics/ Danish are… |
| f) Students who understand mathematics/ Danish the best are… |
| g) Students who care the most about mathematics/Danish are... |

Note: The answer scale is shown as it was presented in the survey.* Item is reverse coded for the measure.

Table A3. Descriptive statistics for mathematics, by gender. Mean (SD)

|  | Male | Female | Total |
| --- | --- | --- | --- |
| Self-concept | 2.471 (1.002) | 1.986 (1.032) | 2.229 (1.045) |
|  |  |  |  |
| Achievement | 0.617 (1.113) | 0.501 (1.159) | 0.559 (1.137) |
|  |  |  |  |
| Student GSB | 5.143 (1.667) | 4.741 (1.334) | 4.942 (1.522) |
|  |  |  |  |
| GSB, male peers | 5.114 (1.147) | 5.059 (1.137) | 5.087 (1.142) |
|  |  |  |  |
| GSB, female peers | 4.764 (0.937) | 4.718 (0.897) | 4.741 (0.917) |
|  |  |  |  |
| Relative female/male achievement | -0.113 (0.551) | -0.095 (0.541) | -0.104 (0.546) |
|  |  |  |  |
| SES, father | 2.754 (0.756) | 2.759 (0.761) | 2.757 (0.758) |
|  |  |  |  |
| SES, mother | 2.951 (0.816) | 2.872 (0.838) | 2.912 (0.828) |
|  |  |  |  |
| GSB, teacher | 3.767 (0.516) | 3.780 (0.501) | 3.774 (0.509) |
|  |  |  |  |
| Female teacher | 0.645 (0.479) | 0.616 (0.487) | 0.631 (0.483) |
|  |  |  |  |
| Teacher age | 45.066 (10.297) | 45.768 (10.572) | 45.416 (10.435) |
|  |  |  |  |
| Teacher experience | 16.284 (10.457) | 17.049 (10.887) | 16.666 (10.675) |
|  |  |  |  |
| Teacher master's degree' | 0.068 (0.253) | 0.064 (0.246) | 0.066 (0.249) |

Table A4. Descriptive statistics for language, by gender. Mean (SD)

|  | Male | Female | Total |
| --- | --- | --- | --- |
| Self-concept | 2.396 (0.857) | 2.522 (0.857) | 2.459 (0.859) |
|  |  |  |  |
| Achievement | 0.940 (0.877) | 1.085 (0.855) | 1.012 (0.868) |
|  |  |  |  |
| Student GSB | 6.523 (0.580) | 6.508 (0.703) | 6.515 (0.644) |
|  |  |  |  |
| GSB, male peers | 6.527 (0.222) | 6.543 (0.210) | 6.535 (0.216) |
|  |  |  |  |
| GSB, female peers | 6.539 (0.238) | 6.514 (0.256) | 6.527 (0.247) |
|  |  |  |  |
| Relative female/male achievement | -0.129 (0.430) | -0.162 (0.426) | -0.146 (0.428) |
|  |  |  |  |
| SES, father | 2.733 (0.756) | 2.750 (0.755) | 2.742 (0.755) |
|  |  |  |  |
| SES, mother | 2.931 (0.830) | 2.899 (0.844) | 2.915 (0.837) |
|  |  |  |  |
| GSB, teacher | 3.570 (1.412) | 3.762 (1.434) | 3.666 (1.426) |
|  |  |  |  |
| Female teacher | 0.732 (0.443) | 0.770 (0.421) | 0.751 (0.433) |
|  |  |  |  |
| Teacher age | 45.765 (10.430) | 45.270 (10.641) | 45.518 (10.534) |
|  |  |  |  |
| Teacher experience | 17.397 (10.748) | 17.261 (10.485) | 17.329 (10.613) |
|  |  |  |  |
| Teacher master's degree' | 0.104 (0.305) | 0.068 (0.251) | 0.086 (0.280) |

Table A5. Correlation matrix – mathematics. Boys below and girls above diagonal.

|  | 1 | 2 | 3 | 4 | 5 | 6 | 7 | 8 | 9 | 10 | 11 | 12 | 13 |
| --- | --- | --- | --- | --- | --- | --- | --- | --- | --- | --- | --- | --- | --- |
| 1.Self-concept | 1.000 | 0.547*** | -0.116* | -0.023 | -0.074 | 0.077 | 0.162*** | 0.088 | 0.054 | 0.002 | -0.010 | -0.055 | 0.065 |
| 2. Achievement | 0.574*** | 1.000 | -0.168*** | -0.154*** | -0.199*** | 0.284*** | 0.267*** | 0.233*** | 0.045 | 0.032 | 0.075 | 0.030 | 0.025 |
| 3. Student GSB | 0.269*** | 0.154*** | 1.000 | 0.519*** | 0.524*** | -0.443*** | 0.007 | 0.005 | 0.210*** | -0.035 | -0.072 | -0.090 | 0.113* |
| 4. GSB, male peers | 0.132** | 0.134** | 0.575*** | 1.000 | 0.802*** | -0.640*** | 0.037 | 0.015 | 0.366*** | -0.128** | -0.187*** | -0.172*** | 0.174*** |
| 5. GSB, female peers | 0.122** | 0.102* | 0.551*** | 0.807*** | 1.000 | -0.666*** | 0.039 | 0.004 | 0.333*** | -0.044 | -0.113* | -0.136** | 0.134** |
| 6. Relative female/male achievement | -0.129** | -0.181*** | -0.445*** | -0.646*** | -0.661*** | 1.000 | 0.004 | 0.055 | -0.397*** | -0.149** | 0.126** | 0.062 | -0.021 |
| 7. SES, father | 0.160*** | 0.310*** | 0.064 | 0.022 | 0.006 | 0.041 | 1.000 | 0.354*** | 0.010 | -0.040 | -0.098* | -0.099* | -0.022 |
| 8. SES, mother | 0.118* | 0.268*** | 0.008 | -0.033 | -0.046 | 0.085 | 0.502*** | 1.000 | 0.020 | -0.027 | -0.062 | 0.009 | 0.028 |
| 9. GSB, teacher | 0.133** | 0.248*** | 0.232*** | 0.335*** | 0.267*** | -0.398*** | 0.117* | 0.114* | 1.000 | 0.208*** | -0.016 | 0.077 | -0.016 |
| 10. Female teacher | 0.037 | 0.129** | -0.135** | -0.187*** | -0.156*** | -0.081 | 0.116* | 0.143** | 0.273*** | 1.000 | 0.040 | 0.102* | 0.045 |
| 11. Teacher age | 0.040 | 0.057 | -0.084 | -0.107* | -0.072 | 0.025 | -0.034 | -0.101* | 0.040 | 0.129** | 1.000 | 0.834*** | 0.152*** |
| 12. Teacher experience | 0.018 | 0.070 | -0.081 | -0.115* | -0.123** | 0.004 | 0.012 | -0.042 | 0.108* | 0.193*** | 0.817*** | 1.000 | 0.083 |
| 13. Teacher master's degree' | -0.007 | 0.074 | 0.110* | 0.136** | 0.088 | 0.035 | 0.098* | 0.120** | -0.097* | 0.130** | 0.116* | 0.057 | 1.000 |

* *p* < 0.05, ** *p* < 0.01, *** *p* < 0.001.

Table A6. Correlation matrix – language. Boys below and girls above diagonal.

|  | 1 | 2 | 3 | 4 | 5 | 6 | 7 | 8 | 9 | 10 | 11 | 12 | 13 |
| --- | --- | --- | --- | --- | --- | --- | --- | --- | --- | --- | --- | --- | --- |
| 1.Self-concept | 1.000 | 0.340*** | 0.091* | 0.014 | 0.018 | -0.069 | 0.047 | 0.023 | 0.105* | 0.082 | -0.056 | -0.074 | -0.065 |
| 2. Achievement | 0.311*** | 1.000 | -0.020 | 0.021 | -0.065 | -0.151*** | 0.204*** | 0.253*** | 0.134** | -0.115** | -0.006 | -0.019 | 0.033 |
| 3. Student GSB | -0.011 | -0.059 | 1.000 | -0.012 | 0.010 | 0.071 | -0.060 | -0.073 | -0.076 | 0.036 | 0.029 | 0.029 | 0.022 |
| 4. GSB, male peers | -0.017 | -0.131** | 0.012 | 1.000 | -0.005 | -0.217*** | 0.006 | -0.020 | 0.319*** | -0.002 | -0.062 | -0.127** | -0.222*** |
| 5. GSB, female peers | 0.048 | -0.051 | 0.010 | 0.016 | 1.000 | 0.238*** | -0.026 | -0.028 | -0.171*** | 0.069 | 0.006 | 0.026 | 0.049 |
| 6. Relative female/male achievement | 0.122** | 0.280*** | -0.105* | -0.323*** | 0.150*** | 1.000 | 0.018 | -0.018 | -0.220*** | 0.064 | 0.208*** | 0.116** | 0.304*** |
| 7. SES, father | 0.074 | 0.318*** | -0.049 | -0.066 | -0.200*** | 0.033 | 1.000 | 0.336*** | 0.005 | -0.082 | 0.089* | 0.100* | 0.089* |
| 8. SES, mother | 0.060 | 0.276*** | -0.019 | -0.052 | -0.149*** | 0.021 | 0.477*** | 1.000 | 0.031 | 0.018 | 0.119** | 0.132** | 0.025 |
| 9. GSB, teacher | -0.071 | 0.027 | 0.105* | 0.311*** | -0.196*** | -0.280*** | 0.033 | 0.031 | 1.000 | 0.018 | -0.146*** | -0.168*** | -0.175*** |
| 10. Female teacher | -0.014 | -0.003 | -0.023 | 0.012 | -0.006 | 0.094* | -0.007 | -0.003 | 0.055 | 1.000 | -0.101* | -0.135** | -0.199*** |
| 11. Teacher age | -0.025 | 0.074 | -0.018 | -0.121** | -0.066 | 0.123** | 0.111** | 0.058 | -0.146*** | -0.100* | 1.000 | 0.871*** | 0.013 |
| 12. Teacher experience | -0.039 | 0.044 | -0.053 | -0.174*** | -0.070 | 0.050 | 0.105* | 0.081 | -0.118** | -0.102* | 0.870*** | 1.000 | 0.006 |
| 13. Teacher master's degree' | 0.027 | 0.196*** | -0.085* | -0.241*** | 0.100* | 0.360*** | 0.131** | 0.079 | -0.210*** | -0.212*** | -0.030 | -0.047 | 1.000 |

* *p* < 0.05, ** *p* < 0.01, *** *p* < 0.001.
